# Supplementary material for: Genomic determinants of pathogenicity in SARS-CoV-2 and other human coronaviruses
Source: PubMed Central journal article supplement (PMC7334499; doi:10.1073/pnas.2008176117), 2020-06-10
Supplement: pnas.2008176117.sapp.pdf [file pnas.2008176117.sapp.pdf]

## Genomic determinants of pathogenicity in SARS-CoV-2 and other human coronaviruses

Ayal B. Gussow<sup>1,\*</sup>, Noam Auslander<sup>1,\*,#</sup>, Guilhem Faure<sup>2</sup>, Yuri I. Wolf<sup>1</sup>, Feng Zhang<sup>2,3,4,5</sup>, Eugene V. Koonin<sup>1,#</sup>

<sup>1</sup>National Center for Biotechnology Information, National Library of Medicine, National Institutes of Health, Bethesda, MD 20894, USA

<sup>2</sup>Broad Institute of MIT and Harvard, Cambridge, MA, USA

<sup>3</sup>McGovern Institute for Brain Research, Massachusetts Institute of Technology, Cambridge, MA 02139, USA

<sup>4</sup>Department of Brain and Cognitive Sciences, Massachusetts Institute of Technology, Cambridge, MA 02139, USA

<sup>5</sup>Department of Biological Engineering, Massachusetts Institute of Technology, Cambridge, MA 02139, USA

\* These authors contributed equally

#For correspondence: [koonin@ncbi.nlm.nih.gov](mailto:koonin@ncbi.nlm.nih.gov); [noam.auslander@nih.gov](mailto:noam.auslander@nih.gov)

## Supporting Information

### Supporting Tables

| Alignment location |       |                           |                  |       |
|--------------------|-------|---------------------------|------------------|-------|
| start              | end   | gene                      | Loc [SARS-Cov-2] | type  |
| 7281               | 7291  | pp1ab (nsp3)              | 3728             | indel |
| 10446              | 10451 | pp1ab (nsp3)              | 6437             | indel |
| 14249              | 14249 | pp1ab (nsp4)              | 9750             | indel |
| 25041              | 25108 | pp1ab (nsp14)             | 19021            | indel |
| 29498              | 29498 | S (spike glycoprotein)    | 22358            | indel |
| 32029              | 32040 | S (spike glycoprotein)    | 24228            | indel |
| 32906              | 32927 | S (spike glycoprotein)    | 25001            | indel |
| 36459              | 36462 | M (membrane glycoprotein) | 27001            | indel |
| 38798              | 38808 | N (nucleocapsid)          | 29114            | indel |
| 38926              | 38941 | N (nucleocapsid)          | 29235            | indel |
| 39356              | 39360 | N (nucleocapsid)          | 29534            | indel |

**Supporting Table 1.** The regions detected from the nucleotide genome alignment. The first two columns indicate the start and end positions of the detected region within the nucleotide genome alignment. Coordinates are inclusive. The third column indicates the gene that the region occurs in, the fourth column is the coordinate of the region in the SARS-CoV-2 reference, and the final column is the type of region detected.

|              | Motif1<br>(NLS1) | Motif2<br>(NES) | Motif3<br>(NLS2) | Motif4<br>(bipartite<br>NLS) | Protein<br>charge |
|--------------|------------------|-----------------|------------------|------------------------------|-------------------|
| YP_009724397 | 3                | 0               | 3                | 8                            | 24                |
| QHR63308     | 3                | 0               | 3                | 8                            | 24                |
| AVP78038     | 3                | 0               | 3                | 8                            | 25                |
| ASO66816     | 3                | 0               | 3                | 8                            | 24                |
| ABD75315     | 3                | 0               | 3                | 8                            | 23                |
| ABG47067     | 3                | 0               | 3                | 8                            | 24                |
| Q3I5I7       | 3                | 0               | 3                | 8                            | 24                |
| AGC74175     | 3                | 0               | 3                | 8                            | 24                |
| AHX37566     | 3                | 0               | 3                | 8                            | 23                |
| AAZ41337     | 3                | 0               | 3                | 8                            | 24                |
| Q3LZX4       | 3                | 0               | 3                | 8                            | 24                |
| ADE34730     | 3                | 0               | 3                | 8                            | 23                |

|              |   |    |   |    |    |
|--------------|---|----|---|----|----|
| AGC74169     | 3 | 0  | 3 | 8  | 24 |
| AAZ67039     | 3 | 0  | 3 | 8  | 24 |
| QQQ468       | 3 | 0  | 3 | 8  | 26 |
| ACU31039     | 3 | 0  | 3 | 8  | 25 |
| ATO98190     | 3 | 0  | 3 | 8  | 24 |
| AGZ48815     | 3 | 0  | 3 | 8  | 24 |
| ARI44802     | 3 | 0  | 3 | 8  | 24 |
| AGZ48841     | 3 | 0  | 3 | 8  | 24 |
| NP_828858    | 3 | 0  | 3 | 8  | 24 |
| AAU04673     | 3 | 0  | 3 | 8  | 24 |
| AAU04658     | 3 | 0  | 3 | 8  | 24 |
| AAU04642     | 3 | 0  | 3 | 8  | 24 |
| APO40586     | 3 | 0  | 3 | 8  | 23 |
| YP_003858591 | 3 | 0  | 3 | 8  | 24 |
| QCC20721     | 3 | 1  | 3 | -3 | 21 |
| QGA70699     | 3 | 1  | 3 | -3 | 20 |
| AHY61344     | 3 | 2  | 2 | -1 | 20 |
| ASL68949     | 3 | 2  | 2 | -1 | 20 |
| YP_009361864 | 3 | 0  | 2 | 3  | 24 |
| AIG13103     | 3 | 0  | 2 | 2  | 23 |
| ASU90688     | 3 | 0  | 2 | 2  | 22 |
| YP_009047211 | 3 | 0  | 2 | 2  | 22 |
| YP_001039969 | 3 | 1  | 2 | 1  | 19 |
| QHA24694     | 3 | 1  | 2 | 1  | 19 |
| AWH65917     | 3 | 1  | 2 | 1  | 20 |
| ANA96046     | 3 | 1  | 2 | 2  | 22 |
| AIA62359     | 3 | 1  | 2 | 2  | 22 |
| AWH65884     | 3 | 1  | 2 | 2  | 22 |
| QQQ4E6       | 3 | 1  | 2 | 2  | 22 |
| YP_001039960 | 3 | 1  | 2 | 2  | 22 |
| YP_173242    | 2 | -1 | 2 | 5  | 12 |
| YP_003029852 | 2 | -1 | 2 | 6  | 17 |
| YP_209238    | 2 | -1 | 2 | 6  | 18 |
| AAB86821     | 2 | -1 | 2 | 6  | 17 |
| NP_045302    | 2 | -1 | 2 | 6  | 17 |
| BAJ52884     | 2 | 0  | 2 | 5  | 17 |
| YP_005454249 | 2 | 0  | 2 | 5  | 16 |
| YP_009555245 | 2 | 0  | 2 | 5  | 16 |
| AAY68302     | 2 | 0  | 2 | 5  | 16 |

|              |   |    |    |    |    |
|--------------|---|----|----|----|----|
| ARC95207     | 2 | 0  | 2  | 5  | 16 |
| BAF75637     | 2 | 0  | 2  | 5  | 16 |
| ACX46856     | 2 | 0  | 2  | 5  | 16 |
| P10527       | 2 | 0  | 2  | 5  | 16 |
| ACJ66950     | 2 | 0  | 2  | 5  | 16 |
| ABG89284     | 2 | 0  | 2  | 5  | 16 |
| AHN64778     | 2 | 0  | 2  | 5  | 17 |
| ACB30189     | 2 | 0  | 2  | 5  | 16 |
| ABI94003     | 2 | 0  | 2  | 5  | 16 |
| AZU96330     | 2 | 0  | 2  | 5  | 16 |
| YP_009019186 | 3 | -1 | 1  | 3  | 22 |
| YP_009256201 | 3 | -1 | 1  | 3  | 23 |
| AFH58015     | 2 | -2 | 1  | 5  | 18 |
| AFG19745     | 2 | -2 | 1  | 4  | 21 |
| AMB66493     | 2 | -2 | 1  | 5  | 22 |
| YP_003771    | 1 | -1 | 3  | 0  | 16 |
| YP_009328939 | 1 | -1 | 2  | 0  | 18 |
| QHA24669     | 0 | -2 | 1  | -1 | 17 |
| APD51503     | 0 | -1 | 2  | -1 | 16 |
| NP_073556    | 0 | -1 | 2  | -2 | 16 |
| YP_009194643 | 0 | -1 | 2  | -2 | 13 |
| AOI28262     | 0 | -1 | 2  | -2 | 14 |
| ATI09441     | 0 | -1 | 2  | -2 | 14 |
| ASL24656     | 1 | 0  | -1 | 4  | 23 |
| AFE85966     | 1 | -2 | -2 | 2  | 20 |
| YP_001351688 | 1 | 0  | -1 | 4  | 20 |
| QCX35174     | 0 | 0  | -1 | 0  | 18 |
| YP_009201734 | 0 | -1 | 0  | 3  | 14 |
| QHA24675     | 0 | -1 | -1 | 3  | 23 |
| YP_001718609 | 0 | -2 | -1 | 3  | 17 |
| QHA24714     | 0 | 0  | -1 | -1 | 19 |
| YP_006908646 | 0 | 0  | -1 | -1 | 18 |
| QCX35164     | 0 | -1 | 1  | 0  | 16 |
| AIA62275     | 0 | 0  | 0  | -1 | 17 |
| YP_009199794 | 0 | 0  | 0  | -1 | 16 |

**Supporting Table 2.** NLS and NES motifs charges and nucleocapsid protein charge of coronavirus strains considered.

| Name         | Genomes<br>(human viruses) | Genomes<br>(all viruses) | Category                                                                                      |
|--------------|----------------------------|--------------------------|-----------------------------------------------------------------------------------------------|
| MERS-CoV     | 284                        | 561                      | High-CFR                                                                                      |
| SARS-CoV     | 92                         | 324                      | High-CFR                                                                                      |
| SARS-CoV-2   | 273                        | 118                      | High-CFR                                                                                      |
| HCoV-HKU1    | 39                         | 574                      | Low-CFR                                                                                       |
| HCoV-NL63    | 60                         | 991                      | Low-CFR                                                                                       |
| HCoV-OC43    | 171                        | 365                      | Low-CFR                                                                                       |
| HCoV-229E    | 25                         | 61                       | Low-CFR                                                                                       |
| <u>Total</u> | 944                        | 2994                     | <u>Human:</u><br>High-CFR: 649; Low-CFR - 295<br><u>All:</u><br>High-CFR: 1003; Low-CFR: 1991 |

**Supporting Table 3.** Number of CoV genomes considered in the analysis.

Supporting Figures

a

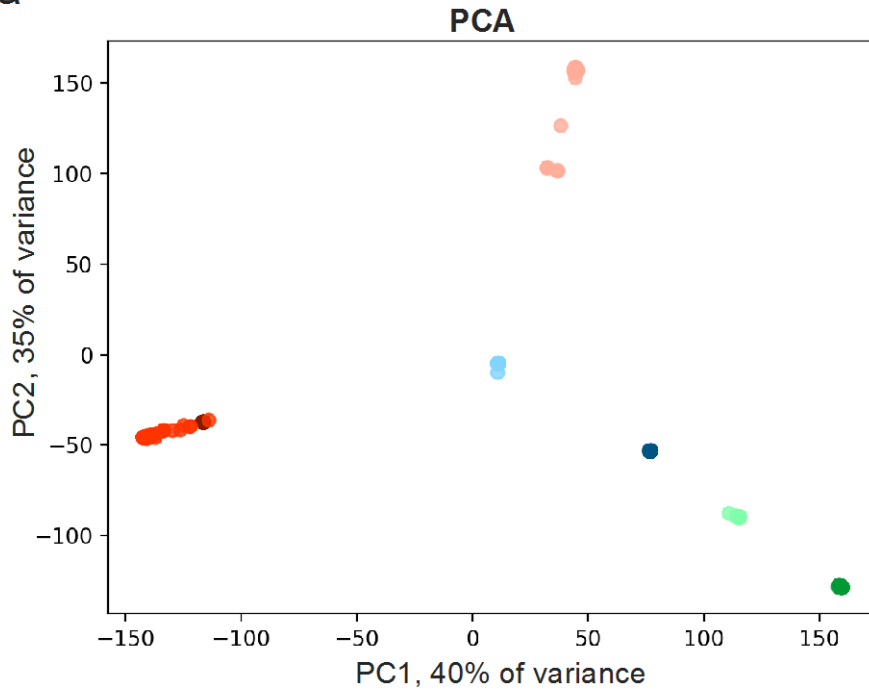

- SARS-CoV
- SARS-CoV-2
- MERS-CoV
- 229E-CoV
- HKU1-CoV
- OC43-CoV
- NL63-CoV

b

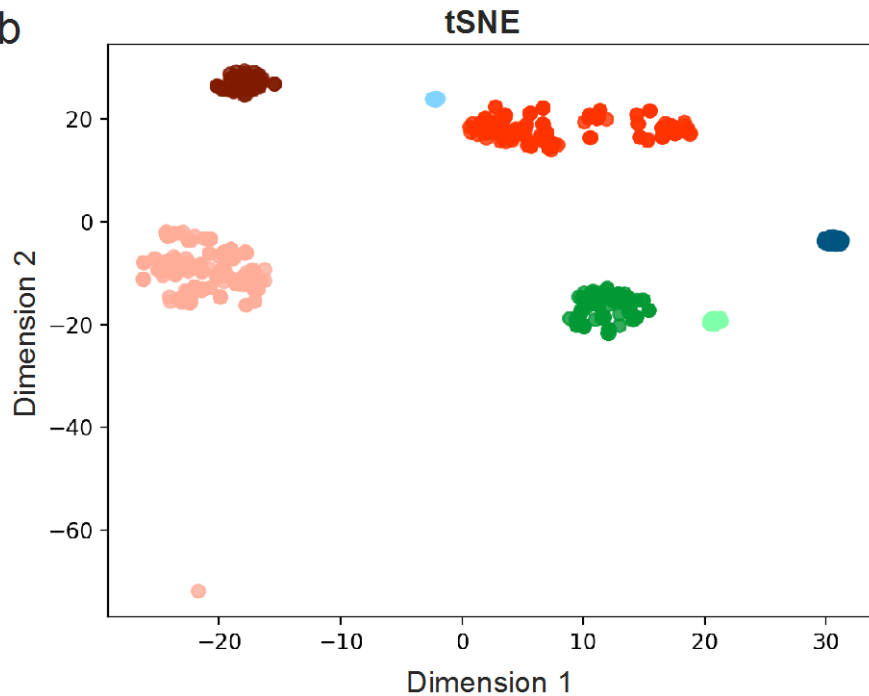

**Supporting Figure 1.** Principle Component Analysis (PCA) and t-Distributed Stochastic Neighbor Embedding (tSNE) of the encoded nucleotide alignments (where a gap is encoded with '1' and a nucleotide with '0').

In both panels, the red shades denote high-CFR CoV (all of which are betacoronaviruses), blue shades denote low-CFR alphacoronaviruses, green shades denote low-CFR betacoronaviruses. Both analyses show that the CFR trait has a stronger influence on genome clustering than phylogeny, and that there is more variability within high-CFR CoV in comparison to the low-CFR CoV. **(a)** PCA scatter plot, with PC1 (X-axis) vs. PC2 (Y-axis) obtained with PCA analysis of the encoded nucleotide alignments. The explained variance by each PC is noted in the axes. **(b)** tSNE scatter plot, with Dimension1 (X-axis) vs. Dimension2 (Y-axis) with 2-dimensions output.

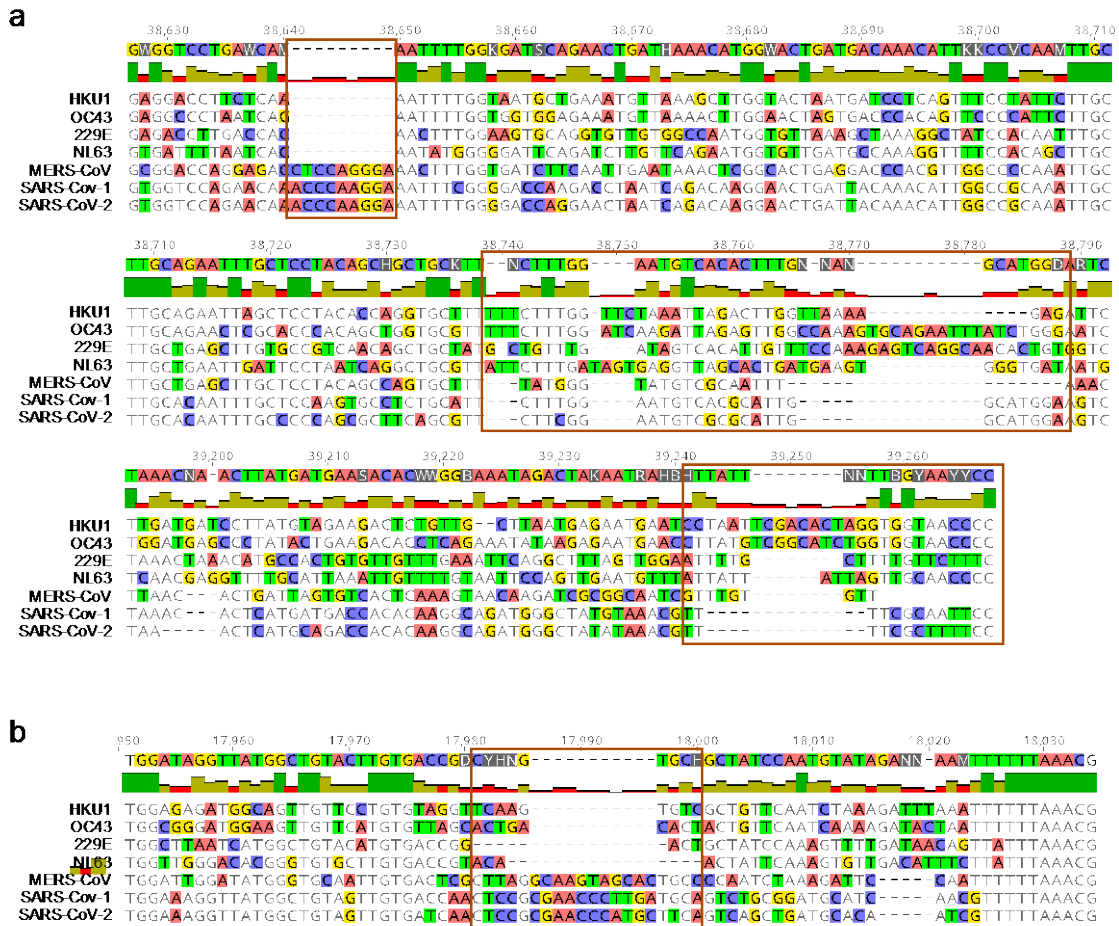

**Supporting Figure 2. (a)** The locations detected within the nucleocapsid protein from the nucleotide genome alignment. **(b)** The location detected within the spike protein from the nucleotide genome alignment.

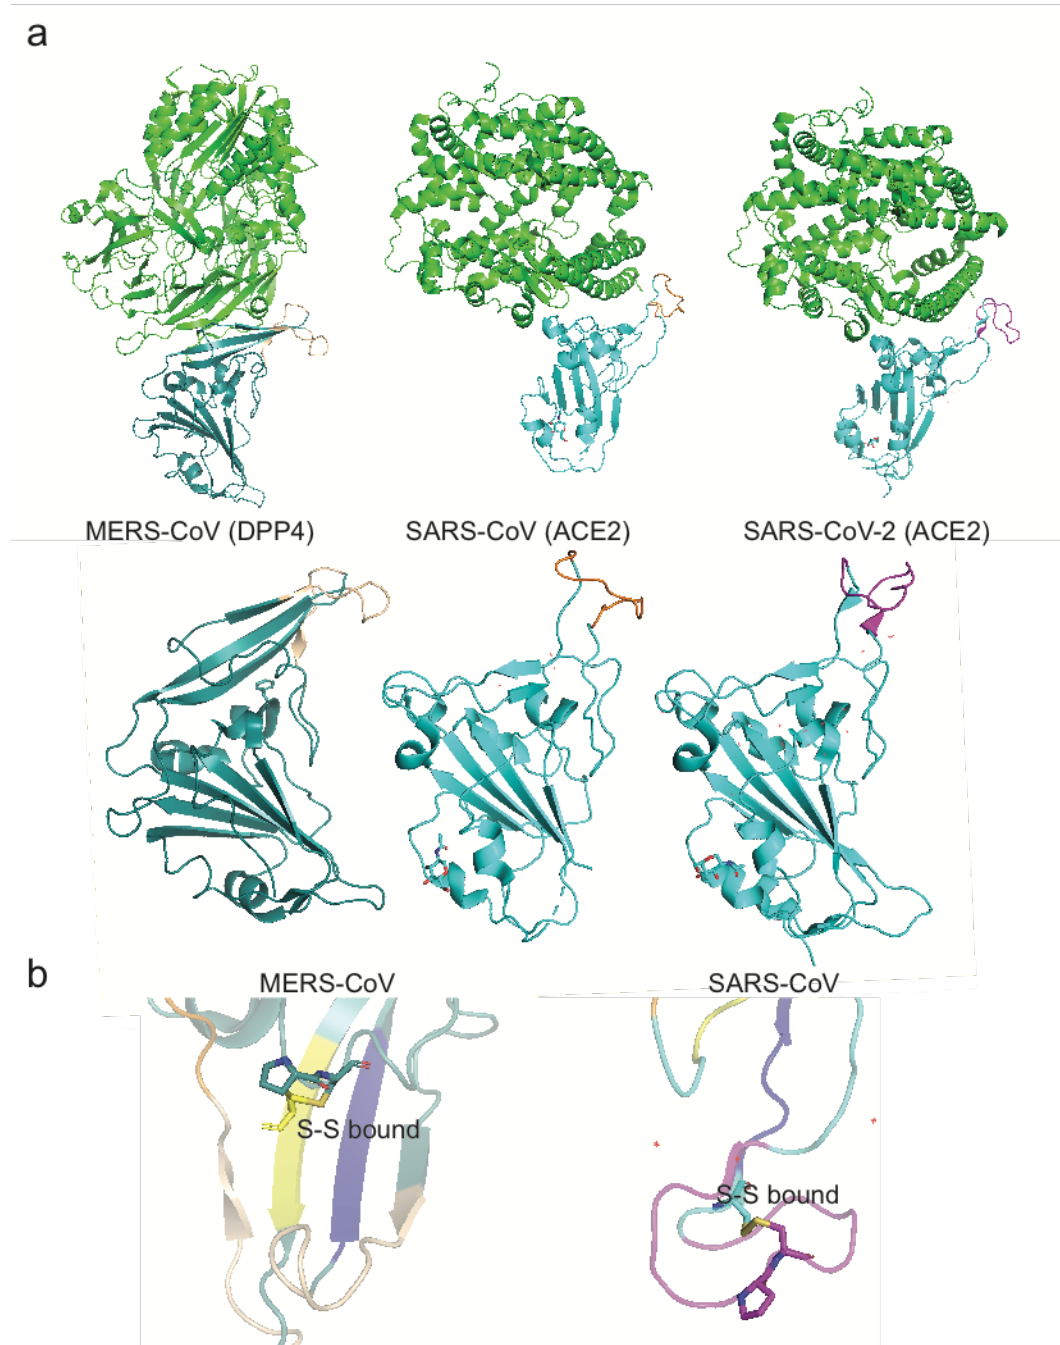

**Supporting Figure 3. (a)** Complete structures of the receptor-binding motifs of SARS-CoV, SARS-CoV-2 and MERS (blue) and the human receptor that they bind to (green) **(b)** Close-up of the Structures of the receptor-binding motifs of SARS-CoV and MERS-CoV. The inserts are highlighted, and the disulfide bonds are shown.
